# Supplementary material for: A Network Pharmacology-Based Study of Potential Targets of Angelicae Pubescentis-Herba Taxilli Compound for the Treatment of Osteoarthritis
Source: Hindawi journal article supplement (doi:10.1155/2022/4286168), 2022-12-28
Supplement: f3 [file 4286168.f3.pdf]

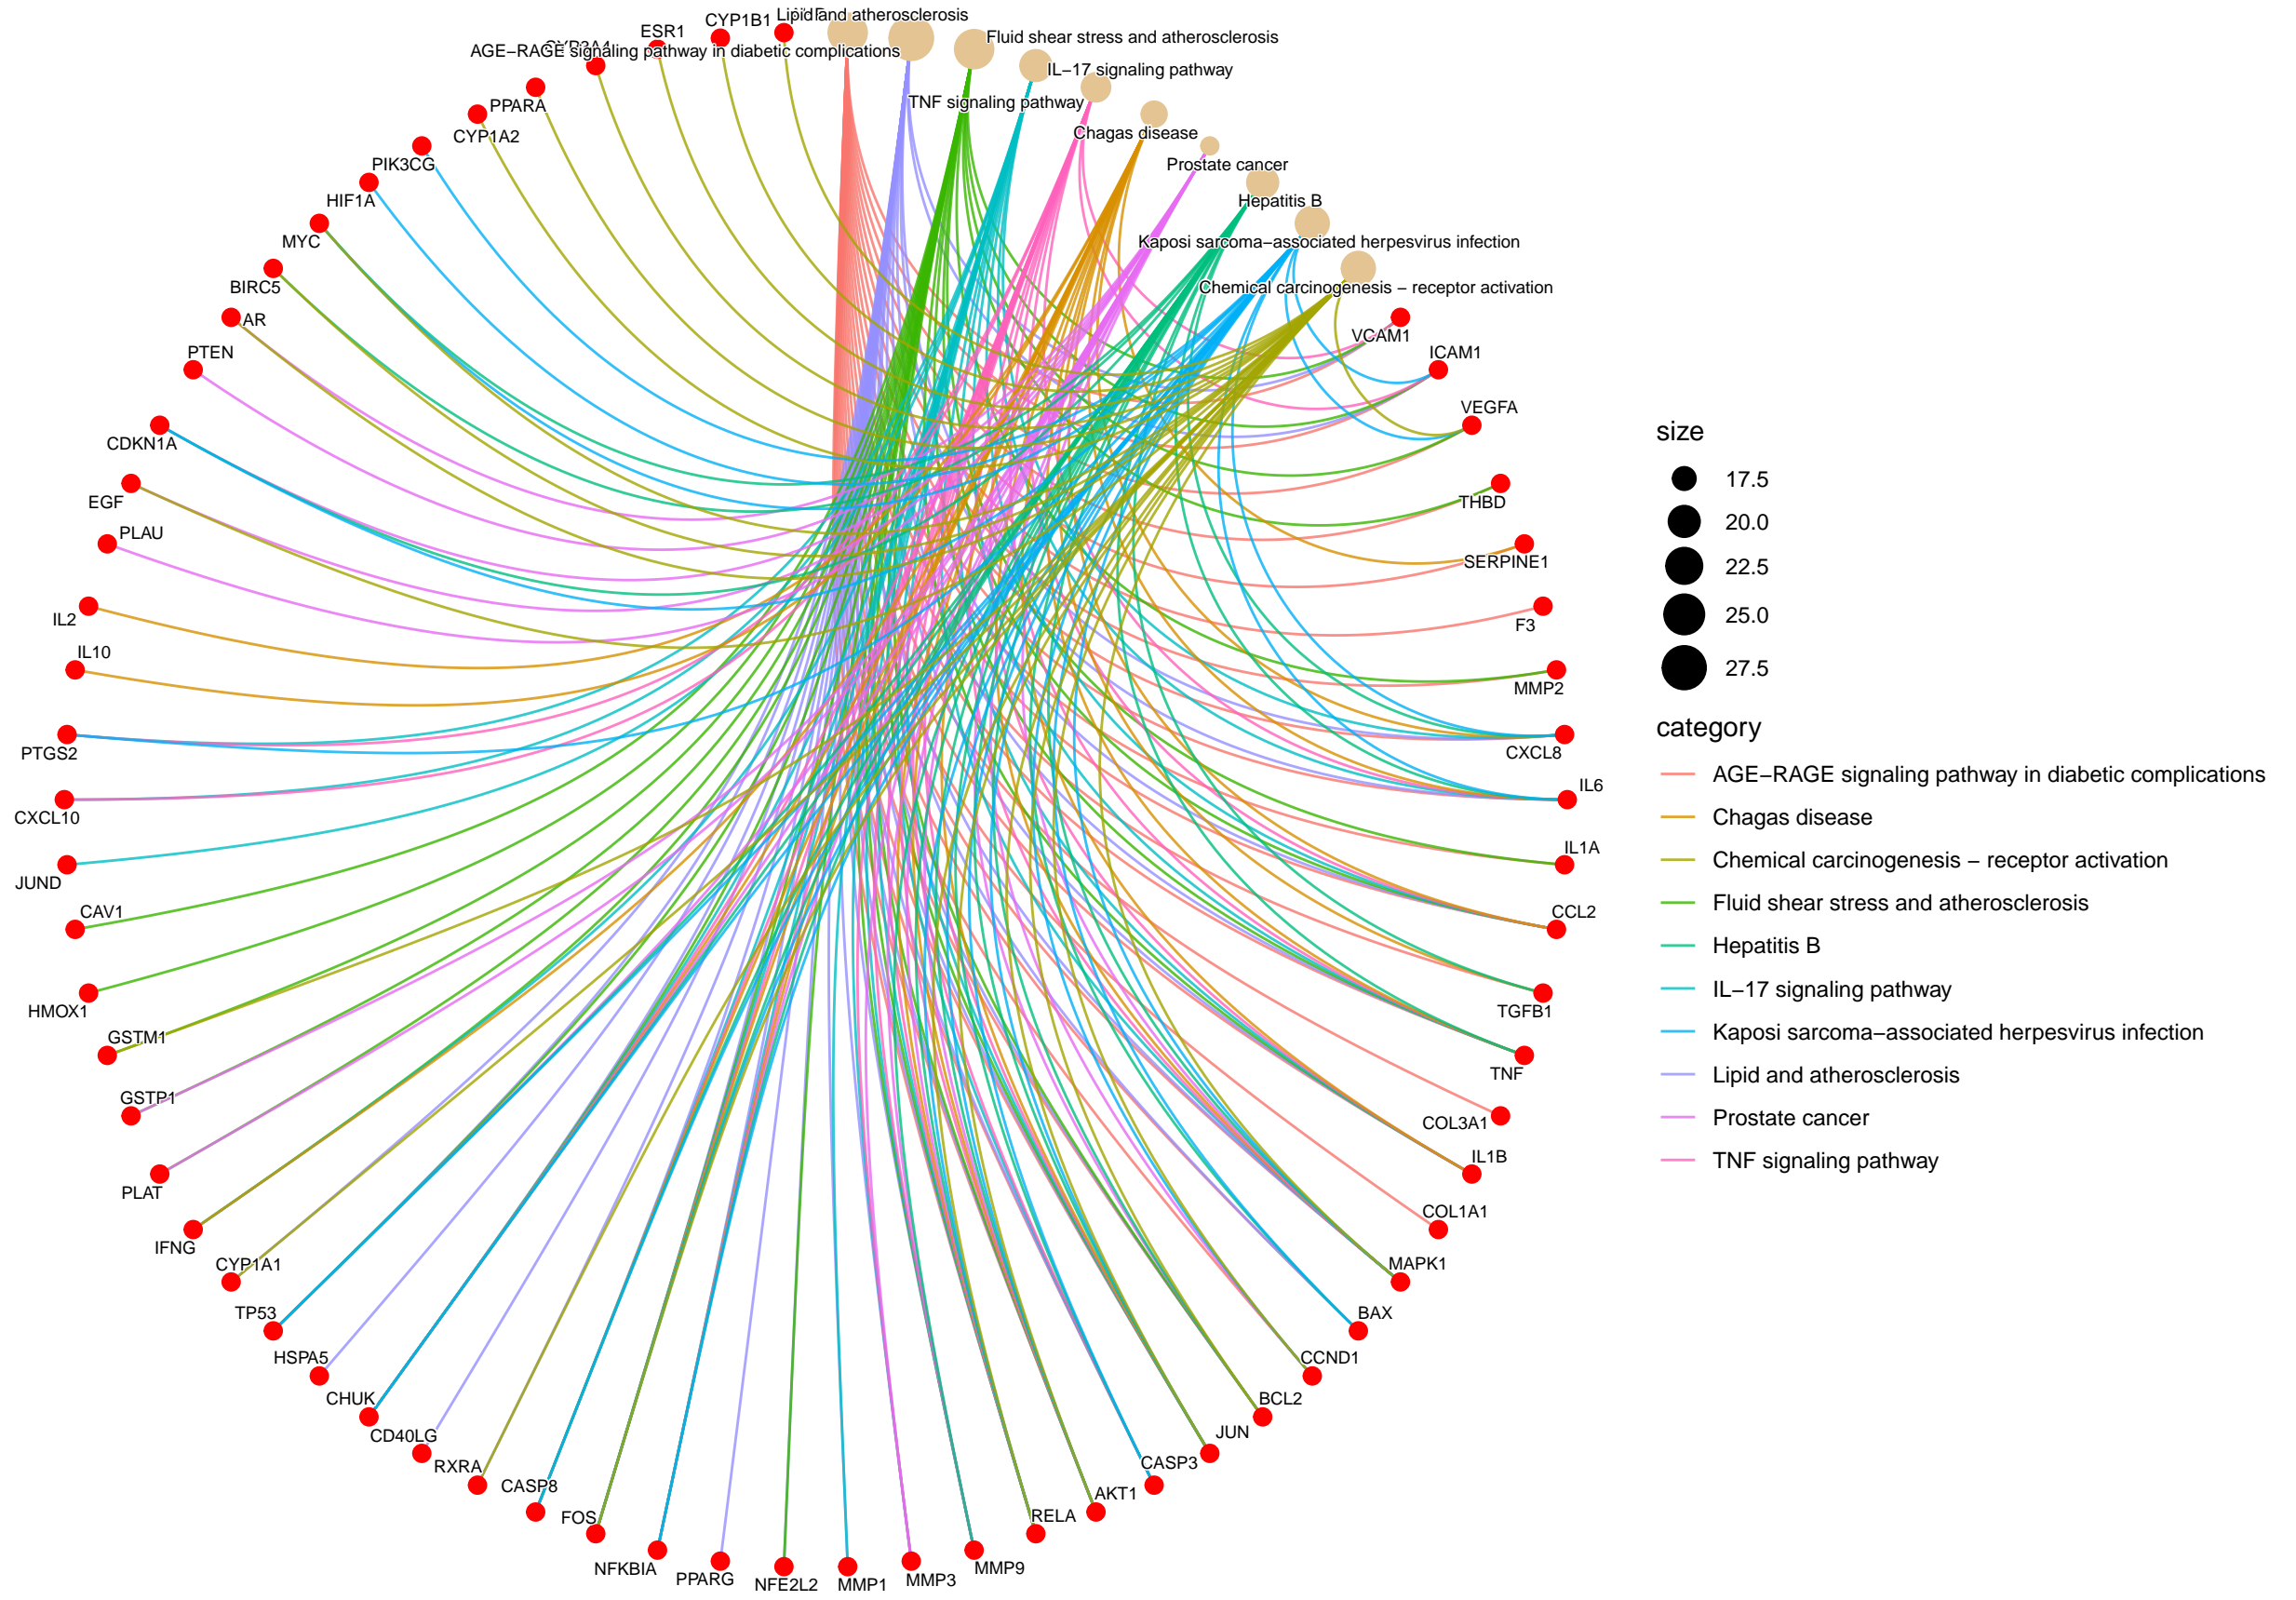

size

- 17.5
- 20.0
- 22.5
- 25.0
- 27.5

category

- AGE-RAGE signaling pathway in diabetic complications
- Chagas disease
- Chemical carcinogenesis – receptor activation
- Fluid shear stress and atherosclerosis
- Hepatitis B
- IL-17 signaling pathway
- Kaposi sarcoma-associated herpesvirus infection
- Lipid and atherosclerosis
- Prostate cancer
- TNF signaling pathway
